# Supplementary material for: Enhanced Effect of IL-1β-Activated Adipose-Derived MSCs (ADMSCs) on Repair of Intestinal Ischemia-Reperfusion Injury via COX-2-PGE2 Signaling
Source: Hindawi journal article supplement (doi:10.1155/2020/2803747), 2020-04-17
Supplement: f1 [file 2803747.f1.pdf]

## Supplementary figures

**Supplementary figure 1** Identification of human ADMSCs. (A) ADMSCs displayed a spindle shape; (B-C) ADMSCs could be induced to differentiate into adipocytes and osteoblasts; (D-F) Flow cytometry showed that ADMSCs highly expressed CD29 and CD90, while lowly expressed CD45.

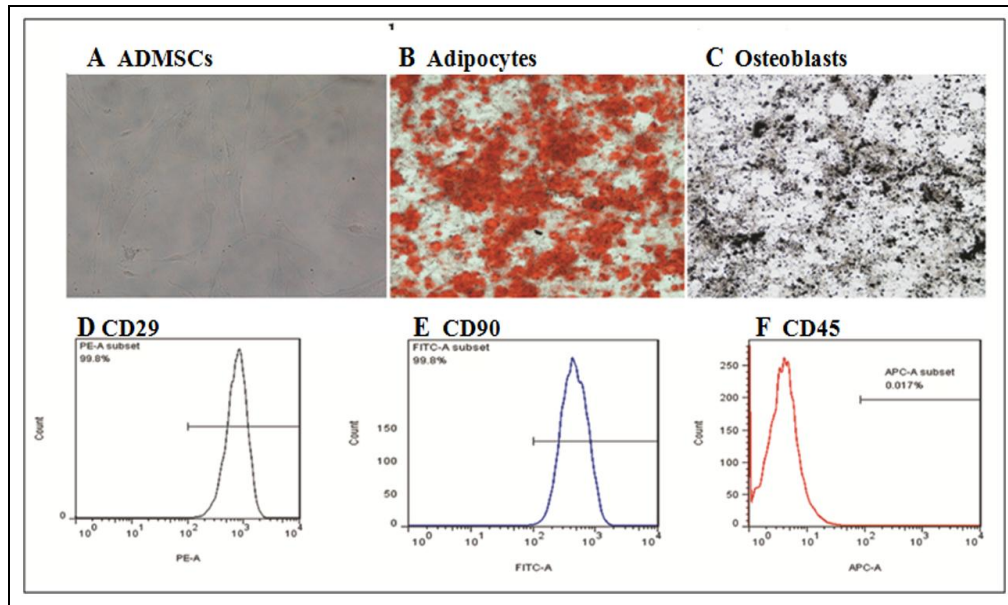

**Supplementary figure 2** IL-1 $\beta$  increased expression of COX-2 and  $\alpha$ -SMA at a dose- and time-dependent manner (A-B).

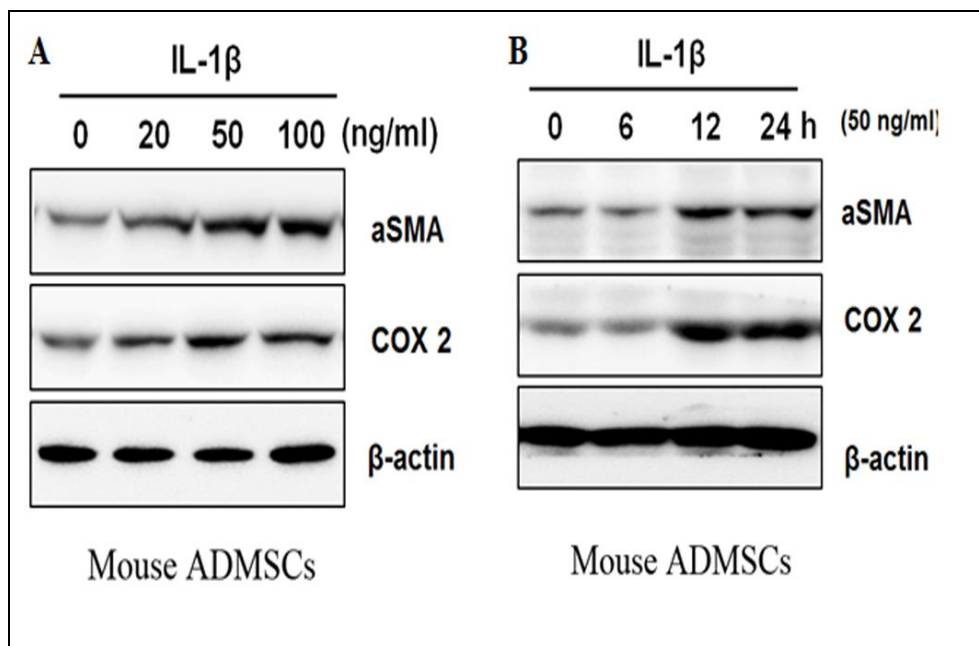

**Supplementary figure 3 (A-B)** IL-1 $\beta$  stimulated secretion of PGE<sub>2</sub> from ADMSCs at a dose- and time-dependent manner. **(C-D)** Pretreatment with 50ng/ml IL-1 $\beta$  did not induce differential secretion of IL-10 and TGF- $\beta$ 1 in ADMSCs (NS no statistical significance, student's t test). **(E-F)** IL-1 $\beta$  treatment induced ADMSCs senescence, including decreased cell proliferation, decreased expressions of p21 and p25 and cellular migration.

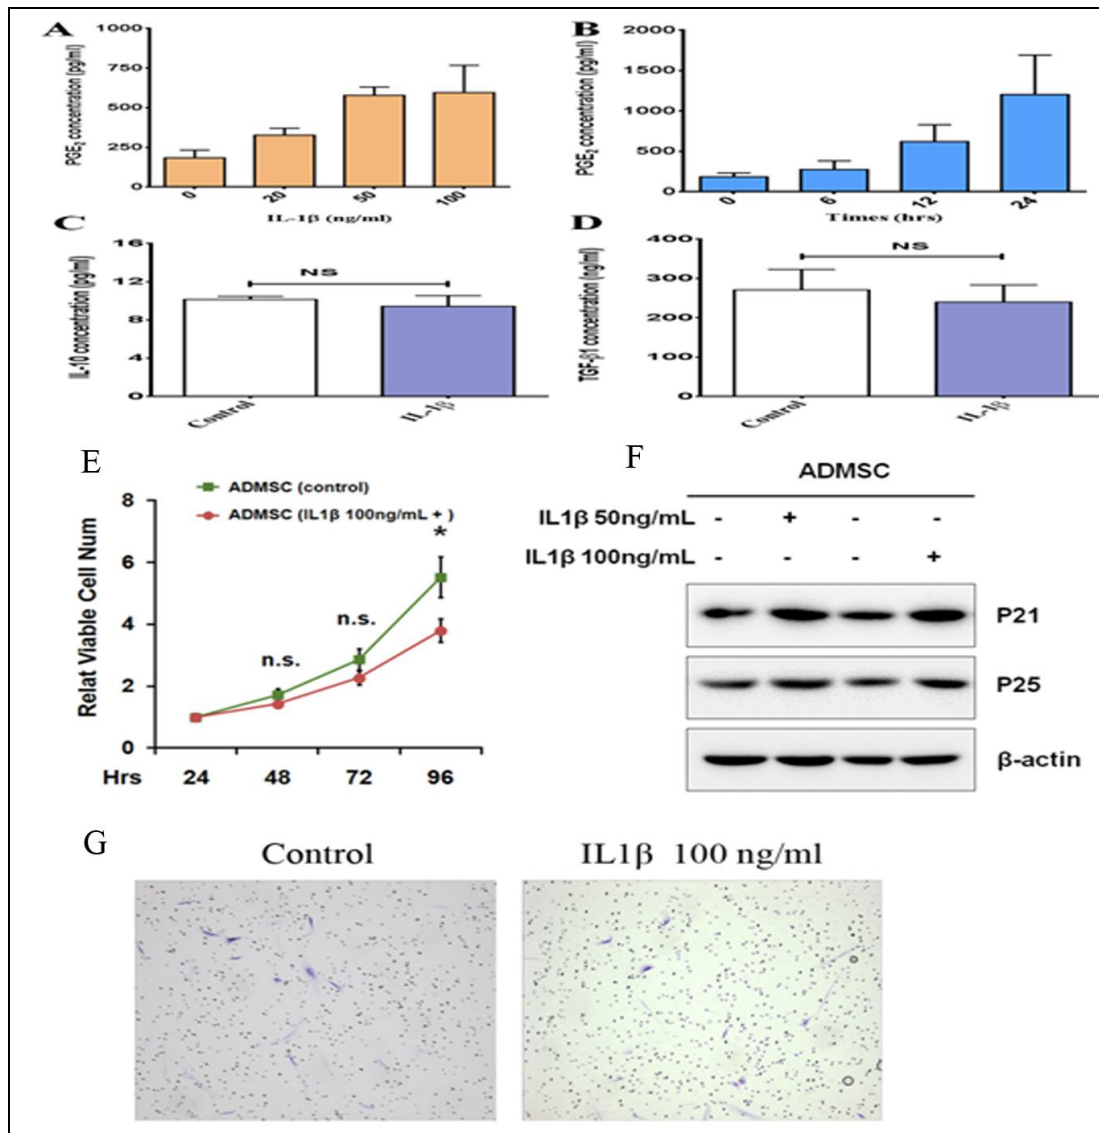

**Supplementary figure 4 (A-B)** Western blot and real-time RT-PCR were used to assess the effect of lentiviral shRNA for silencing of COX-2 expression in ADMSCs. **(C-D)** Inhibition of COX-2 using NS298 (COX-2 inhibitor) suppressed IL-1 $\beta$ -induced expression of COX-2 and  $\alpha$ -SMA in ADMSCs.

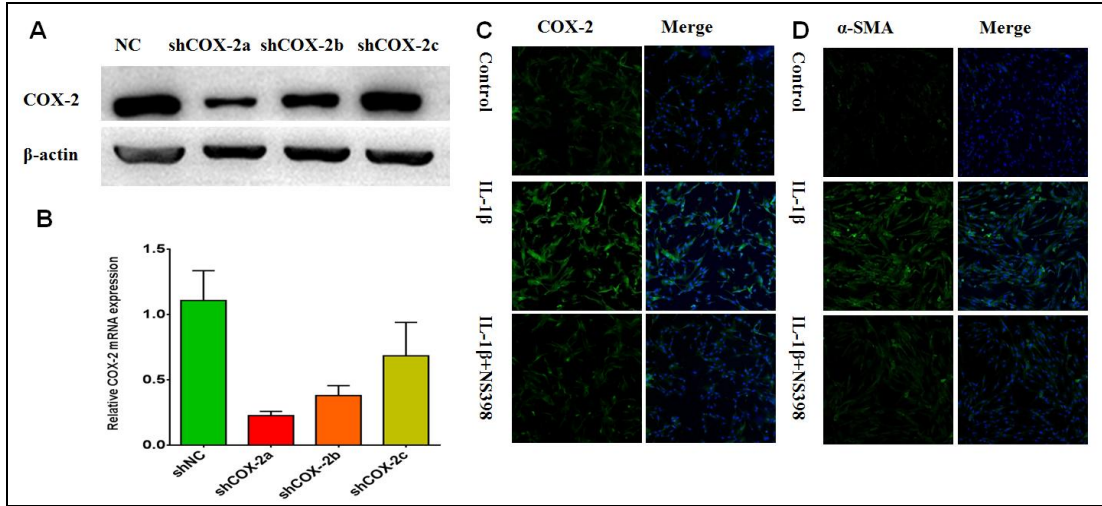

**Supplementary table 1 Primer sequences for real-time RT-PCR (5'-> 3')**

| <b>Gene name</b> | <b>Forward</b>          | <b>Reverse</b>          |
|------------------|-------------------------|-------------------------|
| IL-6             | CCTCTGGTCTTCTGGAGTACC   | ACTCCTTCTGTGACTCCAGC    |
| TNF- $\alpha$    | ATGAGCACAGAAAGCATGA     | AGTAGACAGAAGAGCGTGGT    |
| COX-2            | GAAACTCTGGCTAGACAGCGTAA | AACCGTAGATGCTCAGGGAC    |
| Apaf1            | CAGTAATGGCGTCTTGTCAGT   | AAGCGGCTGCTCGTTGATATT   |
| S100a9           | GCACAGTTGGCAACCTTTATG   | TGATTGTCCTGGTTTGTGTCC   |
| Tnfrsf22         | AAATGTCCCGCTGGTGAATAC   | GGCGGCACGATTCTGGAAA     |
| cxcl2            | CCAACCACCAGGCTACAGG     | GCGTCACACTCAAGCTCTG     |
| cxcl11           | TGTAATTTACCCGAGTAACGGC  | CACCTTTGTCGTTTATGAGCCTT |
| cxcr2            | ATGCCCTCTATTCTGCCAGAT   | GTGCTCCGGTTGTATAAGATGAC |
| cxcr4            | GACTGGCATAGTCGGCAATG    | AGAAGGGGAGTGTGATGACAAA  |
| $\beta$ -actin   | GGCACCACACCTTCTACAATG   | GGGGTGTGTAAGGTCTCAAAC   |
